# Supplementary material for: MiR-765 functions as a tumour suppressor and eliminates lipids in clear cell renal cell carcinoma by downregulating PLP2
Source: PubMed Central journal article supplement — eBioMedicine. 2020 Jan 3;51:102622. doi: 10.1016/j.ebiom.2019.102622 (PMC6948168; doi:10.1016/j.ebiom.2019.102622), 2020-01-03
Supplement: mmc1.pdf [file mmc1.pdf]

**MiR-765 functions as a tumour suppressor and eliminates lipids in clear cell renal cell carcinoma by downregulating PLP2**

Wen Xiao<sup>1#</sup>, Chen Wang<sup>1#</sup>, Ke Chen<sup>1</sup>, Tao Wang<sup>2</sup>, Jinchun Xing<sup>2</sup>, Xiaoping Zhang<sup>1\*</sup> and Xuegang Wang<sup>2\*</sup>

<sup>1</sup>Department of Urology, Union Hospital, Tongji Medical College, Huazhong University of Science and Technology, Wuhan 430022, China

<sup>2</sup> Department of Urology, The First Affiliated Hospital, School of Medicine, Xiamen University, Xiamen, Fujian, China.

Supplementary

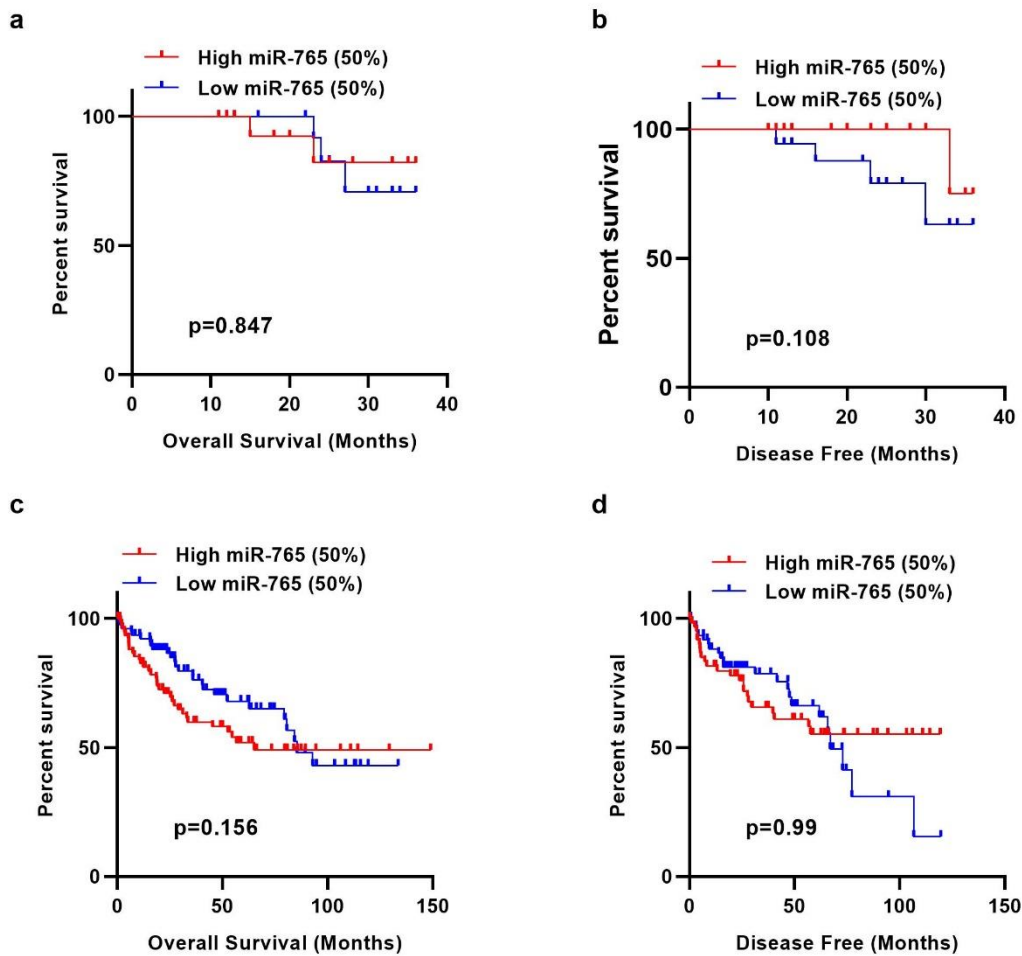

Supplementary Figure 1. Overall survival (OS) or disease-free survival (DFS) in ccRCC patients with different miR-765 expression. (a) and (b) No difference in overall survival (OS) and disease-free survival (DFS) in ccRCC patients. (c) and (d) No difference in overall survival (OS) and disease-free survival (DFS) in TCGA-KIRC database.

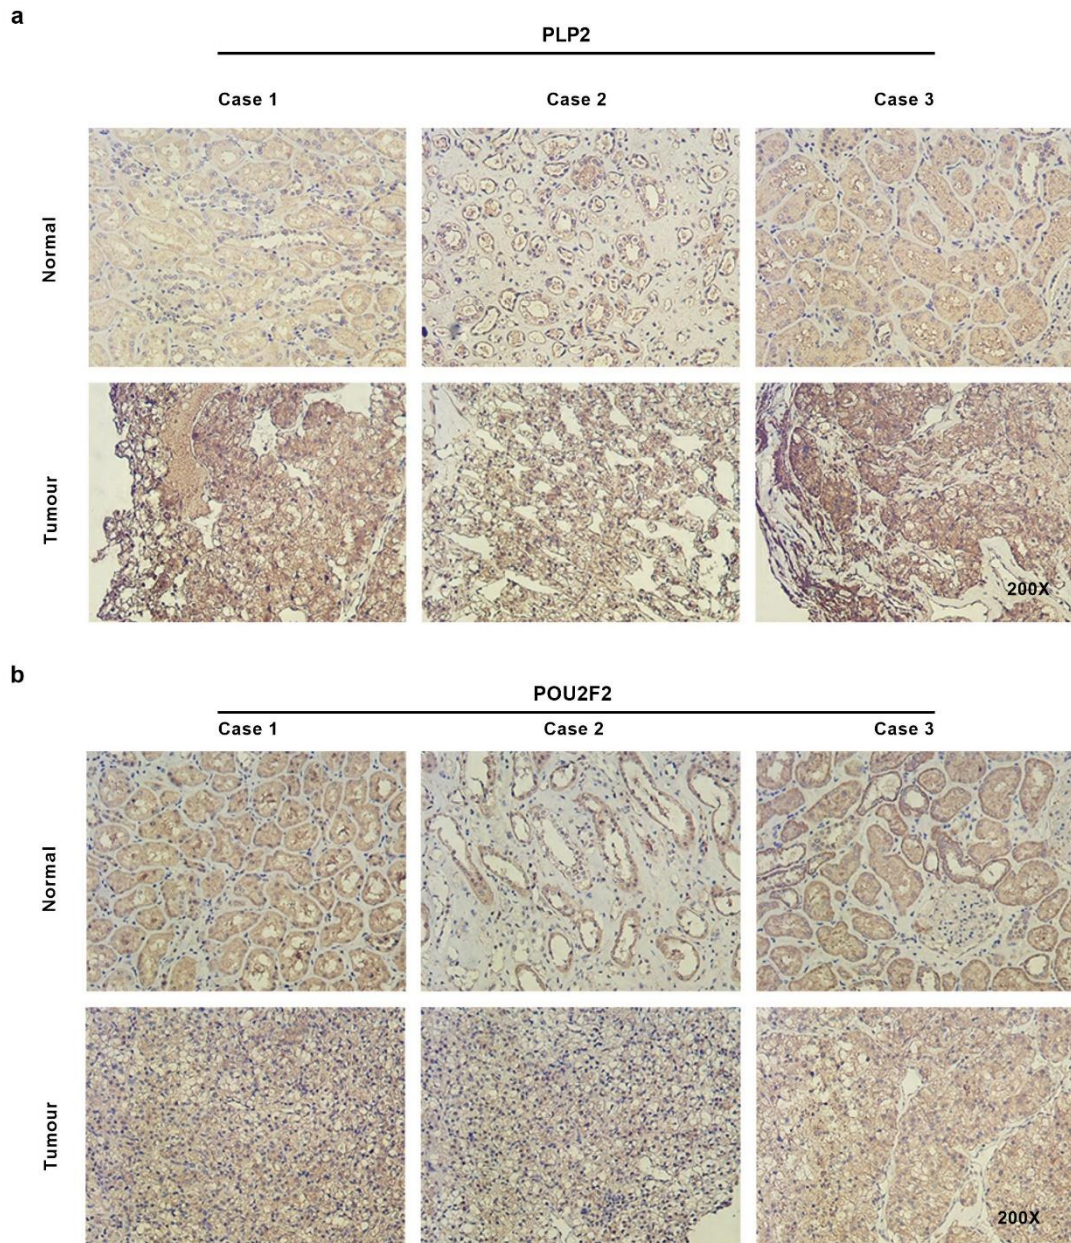

Supplementary Figure 2. IHC showed the protein level of PLP2 and POU2F2 in ccRCC. (a) PLP2 protein level was significantly elevated in ccRCC cancer tissues. (b) POU2F2 protein level was slightly raised in ccRCC cancer tissues. Original magnification x200.
